# Supplementary material for: Synthesis and characterization of trimetallic cobalt, zinc and nickel complexes containing amine-bis(benzotriazole phenolate) ligands: efficient catalysts for coupling of carbon dioxide with epoxides
Source: Royal Society of Chemistry journal article supplement (doi:10.1039/c7dt02841e), 2017-01-01
Supplement: c7dt02841e1.pdf [file c7dt02841e1.pdf]

## Synthesis and characterization of trimetallic cobalt, zinc and nickel complexes containing amine-bis(benzotriazole phenolate) ligands: efficient catalysts for coupling of carbon dioxide with epoxides

Chen-Yu Li,<sup>a,d</sup> Yu-Chia Su,<sup>b</sup> Chia-Her Lin,<sup>a</sup> Hsi-Ya Huang,<sup>a</sup> Chen-Yen Tsai,<sup>\*b</sup> Ting-Yu Lee<sup>\*c</sup> and Bao-Tsan Ko<sup>\*a,b</sup>

<sup>a</sup>Department of Chemistry, Chung Yuan Christian University, Chung-Li 32023, Taiwan

<sup>b</sup>Department of Chemistry, National Chung Hsing University, Taichung 402, Taiwan

<sup>c</sup>Department of Applied Chemistry, National Kaohsiung University, Kaohsiung 81148, Taiwan

<sup>d</sup>Technology Research Development, Plastic Industrial Development Center, Taichung 407, Taiwan

**Table S1** Selected bond length (Å) and bond angles (°) for cobalt complex **1**

**Table S2** Selected bond length (Å) and bond angles (°) for zinc complex **2**

**Table S3** Selected bond length (Å) and bond angles (°) for nickel complex **3**

**Table S4** Crystallographic data of complexes **1-3**

**Fig. S1** <sup>1</sup>H NMR spectrum of the methine region of crude sample produced by coupling of cyclohexene oxide and CO<sub>2</sub> using cobalt acetate complex **1** in the presence of *n*-Bu<sub>4</sub>NCl (5 mol%) at 80 °C and 300 psi CO<sub>2</sub> (400 MHz, CDCl<sub>3</sub>).

**Fig. S2** <sup>1</sup>H NMR spectrum of the crude sample from cycloaddition of **4b** and CO<sub>2</sub> using tri-cobalt acetate complex **1** in the presence of *n*-Bu<sub>4</sub>NCl.

**Fig. S3** <sup>1</sup>H NMR spectrum of the crude sample from cycloaddition of **4c** and CO<sub>2</sub> using tri-cobalt acetate complex **1** in the presence of *n*-Bu<sub>4</sub>NCl.

**Fig. S4** <sup>1</sup>H NMR spectrum of the crude sample from cycloaddition of **4d** and CO<sub>2</sub> using tri-cobalt acetate complex **1** in the presence of *n*-Bu<sub>4</sub>NCl.

**Fig. S5** <sup>1</sup>H NMR spectrum of the crude sample from cycloaddition of **4e** and CO<sub>2</sub> using tri-

cobalt acetate complex **1** in the presence of *n*-Bu<sub>4</sub>NCl.

**Fig. S6** <sup>1</sup>H NMR spectrum of the crude sample from cycloaddition of **4f** and CO<sub>2</sub> using tri-cobalt acetate complex **1** in the presence of *n*-Bu<sub>4</sub>NCl.

**Fig. S7** <sup>1</sup>H NMR spectrum of the crude sample from cycloaddition of **4g** and CO<sub>2</sub> using tri-cobalt acetate complex **1** in the presence of *n*-Bu<sub>4</sub>NCl.

**Fig. S8** <sup>1</sup>H NMR spectrum of the crude sample from cycloaddition of **4h** and CO<sub>2</sub> using tri-cobalt acetate complex **1** in the presence of *n*-Bu<sub>4</sub>NCl.

**Fig. S9** <sup>1</sup>H NMR spectrum of the crude sample from cycloaddition of **4i** and CO<sub>2</sub> using tri-cobalt acetate complex **1** in the presence of *n*-Bu<sub>4</sub>NCl.

**Fig. S10** Variable-temperature <sup>1</sup>H NMR spectrum (400 MHz) of tri-Zn complex **2** in CDCl<sub>3</sub> taken at different temperatures: (a) 25 °C; (b) 0 °C; (c) -30 °C ; (d) -60 °C.

**Fig. S11** <sup>13</sup>C NMR spectrum of tri-Zn complex **2** in CDCl<sub>3</sub> (25 °C).

**Table S1** Selected bond length (Å) and bond angles (°) for cobalt complex **1**

| <b>Complex 1</b>  |            |                       |            |
|-------------------|------------|-----------------------|------------|
| Co(1)-O(1)        | 2.001(4)   | Co(1)-N(7)            | 2.253(4)   |
| Co(1)-O(2)        | 1.936(4)   | Co(1)-N(8)            | 2.109(5)   |
| Co(1)-O(3)        | 2.040(4)   |                       |            |
| Co(2)-O(1)        | 2.066(3)   | Co(2)-O(7)            | 2.026(4)   |
| Co(2)-O(4)        | 2.110(4)   | Co(2)-N(1)            | 2.115(5)   |
| Co(2)-O(5)        | 2.013(4)   | Co(2)-N(11)           | 2.162(5)   |
| Co(3)-O(5)        | 2.025(4)   | Co(3)-N(15)           | 2.218(4)   |
| Co(3)-O(6)        | 1.972(4)   | Co(3)-N(16)           | 2.164(5)   |
| Co(3)-O(8)        | 2.050(4)   | Co(1)...Co(3)         | 5.0201(11) |
| O(1)-Co(1)-O(2)   | 135.37(15) | O(2)-Co(1)-N(7)       | 89.41(15)  |
| O(1)-Co(1)-O(3)   | 91.53(15)  | O(3)-Co(1)-N(7)       | 177.44(16) |
| O(2)-Co(1)-O(3)   | 92.88(15)  | O(2)-Co(1)-N(8)       | 106.55(17) |
| O(1)-Co(1)-N(7)   | 87.64(15)  | O(3)-Co(1)-N(8)       | 96.65(16)  |
| O(1)-Co(1)-N(8)   | 116.98(17) | N(7)-Co(1)-N(8)       | 81.59(16)  |
| O(1)-Co(2)-O(4)   | 95.60(14)  | N(1)-Co(2)-O(4)       | 97.52(16)  |
| O(1)-Co(2)-O(5)   | 96.41(14)  | N(1)-Co(2)-O(5)       | 177.03(16) |
| O(1)-Co(2)-O(7)   | 166.47(15) | N(1)-Co(2)-O(7)       | 85.93(16)  |
| O(4)-Co(2)-O(5)   | 80.10(15)  | N(11)-Co(2)-O(1)      | 90.91(15)  |
| O(4)-Co(2)-O(7)   | 91.98(15)  | N(11)-Co(2)-O(4)      | 162.84(17) |
| O(5)-Co(2)-O(7)   | 95.91(15)  | N(11)-Co(2)-O(5)      | 83.41(16)  |
| N(1)-Co(2)-O(1)   | 82.00(15)  | N(11)-Co(2)-O(7)      | 84.99(16)  |
| N(1)-Co(2)-N(11)  | 99.10(17)  | O(6)-Co(3)-N(16)      | 102.52(16) |
| O(5)-Co(3)-O(6)   | 157.15(16) | O(8)-Co(3)-N(16)      | 88.66(16)  |
| O(5)-Co(3)-O(8)   | 93.92(15)  | O(5)-Co(3)-N(15)      | 87.84(15)  |
| O(6)-Co(3)-O(8)   | 91.75(15)  | O(6)-Co(3)-N(15)      | 90.29(15)  |
| O(5)-Co(3)-N(16)  | 99.73(16)  | O(8)-Co(3)-N(15)      | 170.27(16) |
| N(15)-Co(3)-N(16) | 81.61(17)  | Co(1)...Co(2)...Co(3) | 94.52(27)  |

**Table S2** Selected bond length (Å) and bond angles (°) for zinc complex **2**

| <b>Complex 2</b>  |            |                       |            |
|-------------------|------------|-----------------------|------------|
| Zn(1)-O(1)        | 1.9594(12) | Zn(1)-N(7)            | 2.2682(16) |
| Zn(1)-O(2)        | 1.9261(14) | Zn(1)-N(8)            | 2.1027(17) |
| Zn(1)-O(3)        | 2.0846(14) |                       |            |
| Zn(2)-O(1)        | 2.1225(13) | Zn(2)-O(7)            | 2.0478(13) |
| Zn(2)-O(4)        | 2.0217(13) | Zn(2)-N(1)            | 2.1869(16) |
| Zn(2)-O(5)        | 2.0312(13) | Zn(2)-N(11)           | 2.2445(15) |
| Zn(3)-O(5)        | 1.9865(13) | Zn(3)-N(15)           | 2.2818(15) |
| Zn(3)-O(6)        | 1.9433(13) | Zn(3)-N(16)           | 2.1131(16) |
| Zn(3)-O(8)        | 2.0485(13) | Zn(1)...Zn(3)         | 5.7310(4)  |
| O(1)-Zn(1)-O(2)   | 123.63(6)  | O(2)-Zn(1)-N(7)       | 92.37(6)   |
| O(1)-Zn(1)-O(3)   | 92.55(5)   | O(3)-Zn(1)-N(7)       | 172.63(6)  |
| O(2)-Zn(1)-O(3)   | 93.10(6)   | O(2)-Zn(1)-N(8)       | 118.08(6)  |
| O(1)-Zn(1)-N(7)   | 88.53(5)   | O(3)-Zn(1)-N(8)       | 91.57(6)   |
| O(1)-Zn(1)-N(8)   | 117.75(6)  | N(7)-Zn(1)-N(8)       | 81.49(6)   |
| O(1)-Zn(2)-O(4)   | 95.37(5)   | N(1)-Zn(2)-O(4)       | 95.25(6)   |
| O(1)-Zn(2)-O(5)   | 93.45(5)   | N(1)-Zn(2)-O(5)       | 168.54(6)  |
| O(1)-Zn(2)-O(7)   | 162.94(5)  | N(1)-Zn(2)-O(7)       | 87.31(6)   |
| O(4)-Zn(2)-O(5)   | 93.25(5)   | N(11)-Zn(2)-O(1)      | 86.57(5)   |
| O(4)-Zn(2)-O(7)   | 94.76(6)   | N(11)-Zn(2)-O(4)      | 170.98(6)  |
| O(5)-Zn(2)-O(7)   | 99.65(5)   | N(11)-Zn(2)-O(5)      | 77.83(5)   |
| N(1)-Zn(2)-O(1)   | 78.12(5)   | N(11)-Zn(2)-O(7)      | 85.57(5)   |
| N(1)-Zn(2)-N(11)  | 93.77(6)   | O(6)-Zn(3)-N(16)      | 118.36(6)  |
| O(5)-Zn(3)-O(6)   | 119.10(5)  | O(8)-Zn(3)-N(16)      | 94.43(6)   |
| O(5)-Zn(3)-O(8)   | 92.51(5)   | O(5)-Zn(3)-N(15)      | 88.04(5)   |
| O(6)-Zn(3)-O(8)   | 94.53(6)   | O(6)-Zn(3)-N(15)      | 89.61(5)   |
| O(5)-Zn(3)-N(16)  | 121.22(6)  | O(8)-Zn(3)-N(15)      | 174.92(6)  |
| N(15)-Zn(3)-N(16) | 80.99(6)   | Zn(1)...Zn(2)...Zn(3) | 108.98(8)  |

**Table S3** Selected bond length (Å) and bond angles (°) for nickel complex **3**

| <b>Complex 3</b>  |            |                        |            |
|-------------------|------------|------------------------|------------|
| Ni(1)-O(1)        | 2.0626(18) | Ni(1)-N(7)             | 2.195(2)   |
| Ni(1)-O(2)        | 2.0779(17) | Ni(1)-N(8)             | 2.048(2)   |
| Ni(1)-O(3)        | 2.148(2)   | Ni(1)-O(5)             | 2.0007(17) |
| Ni(2)-O(2)        | 2.1404(17) | Ni(2)-O(4)             | 2.0099(18) |
| Ni(2)-O(2A)       | 2.1404(17) | Ni(2)-O(4A)            | 2.0099(18) |
| Ni(2)-N(4)        | 2.047(2)   | Ni(2)-N(4A)            | 2.047(2)   |
|                   |            | Ni(1)...Ni(1A)         | 6.8512(6)  |
| O(1)-Ni(1)-O(2)   | 169.18(7)  | O(2)-Ni(1)-N(7)        | 93.83(7)   |
| O(1)-Ni(1)-O(3)   | 87.68(7)   | O(3)-Ni(1)-N(7)        | 175.49(7)  |
| O(2)-Ni(1)-O(3)   | 88.60(7)   | O(2)-Ni(1)-N(8)        | 94.00(7)   |
| O(1)-Ni(1)-N(7)   | 90.59(8)   | O(3)-Ni(1)-N(8)        | 90.27(8)   |
| O(1)-Ni(1)-N(8)   | 96.17(8)   | N(7)-Ni(1)-N(8)        | 85.77(8)   |
| O(5)-Ni(1)-O(1)   | 81.47(7)   | O(5)-Ni(1)-N(7)        | 89.82(8)   |
| O(5)-Ni(1)-O(2)   | 88.67(7)   | O(5)-Ni(1)-N(8)        | 174.99(8)  |
| O(5)-Ni(1)-O(3)   | 94.04(8)   | O(4)-Ni(2)-O(4A)       | 90.13(11)  |
| O(2)-Ni(2)-O(4)   | 100.99(7)  | O(4)-Ni(2)-N(4)        | 88.85(8)   |
| O(2)-Ni(2)-O(4A)  | 86.73(7)   | O(4A)-Ni(2)-N(4)       | 171.80(8)  |
| O(4A)-Ni(2)-N(4A) | 88.84(8)   | O(4)-Ni(2)-N(4A)       | 171.80(8)  |
| N(4)-Ni(2)-N(4A)  | 93.31(12)  | N(4)-Ni(2)-O(2A)       | 87.07(7)   |
| O(4)-Ni(2)-O(2A)  | 86.74(7)   | N(4A)-Ni(2)-O(2A)      | 85.48(7)   |
| O(4A)-Ni(2)-O(2A) | 100.99(7)  | N(4)-Ni(2)-O(2)        | 85.48(7)   |
| O(2A)-Ni(2)-O(2)  | 169.13(9)  | N(4A)-Ni(2)-O(2)       | 87.07(7)   |
|                   |            | Ni(1)...Ni(2)...Ni(1A) | 135.58(7)  |

**Table S4** Crystallographic data of complexes **1-3**

|                                                    | <b>1</b> $\cdot 2\text{CH}_2\text{Cl}_2\cdot\text{C}_6\text{H}_{14}$      | <b>2</b>                                                       | <b>3</b>                                                          |
|----------------------------------------------------|---------------------------------------------------------------------------|----------------------------------------------------------------|-------------------------------------------------------------------|
| formula                                            | $\text{C}_{76}\text{H}_{88}\text{Cl}_4\text{Co}_3\text{N}_{16}\text{O}_8$ | $\text{C}_{68}\text{H}_{70}\text{N}_{16}\text{O}_8\text{Zn}_3$ | $\text{C}_{68}\text{H}_{74}\text{Ni}_3\text{N}_{16}\text{O}_{10}$ |
| Formula weight                                     | 1672.21                                                                   | 1435.57                                                        | 1451.56                                                           |
| Temp (K)                                           | 100(2) K                                                                  | 100(2) K                                                       | 100(2) K                                                          |
| Crystal system                                     | Triclinic                                                                 | Triclinic                                                      | Monoclinic                                                        |
| Space group                                        | <i>P</i> -1                                                               | <i>P</i> -1                                                    | <i>C</i> 2/ <i>c</i>                                              |
| <i>a</i> (Å)                                       | 14.6622(3)                                                                | 15.2998(3)                                                     | 31.3010(11)                                                       |
| <i>b</i> (Å)                                       | 15.0595(3)                                                                | 16.3673(3)                                                     | 14.6377(5)                                                        |
| <i>c</i> (Å)                                       | 19.7854(5)                                                                | 16.6280(3)                                                     | 21.7838(14)                                                       |
| $\alpha$ (deg)                                     | 92.9070(10)                                                               | 74.5940(10)                                                    | 90                                                                |
| $\beta$ (deg)                                      | 102.128(2)                                                                | 67.2980(10)                                                    | 132.1870(10)                                                      |
| $\gamma$ (deg)                                     | 114.9770(10)                                                              | 62.4570(10)                                                    | 90                                                                |
| <i>V</i> (Å <sup>3</sup> )                         | 3823.54(15)                                                               | 3386.56(11)                                                    | 7395.3(6)                                                         |
| <i>Z</i>                                           | 2                                                                         | 2                                                              | 4                                                                 |
| <i>D</i> <sub>calc</sub> (Mg/m <sup>3</sup> )      | 1.452                                                                     | 1.408                                                          | 1.304                                                             |
| $\mu$ (Mo K $\alpha$ )(mm <sup>-1</sup> )          | 0.850                                                                     | 1.121                                                          | 0.821                                                             |
| <i>F</i> (000)                                     | 1738                                                                      | 1488                                                           | 3032                                                              |
| Reflections collected                              | 66988                                                                     | 60723                                                          | 63964                                                             |
| No. of parameters                                  | 976                                                                       | 866                                                            | 451                                                               |
| Indep. reflns ( <i>R</i> <sub>int</sub> )          | 19047(0.1169)                                                             | 16763(0.0274)                                                  | 9184(0.0278)                                                      |
| <i>R</i> 1[ <i>I</i> > 2 $\sigma$ ( <i>I</i> )]    | 0.0759                                                                    | 0.0319                                                         | 0.0285                                                            |
| w <i>R</i> 2 [ <i>I</i> > 2 $\sigma$ ( <i>I</i> )] | 0.1893                                                                    | 0.0830                                                         | 0.0787                                                            |
| Goodness-of-fit on <i>F</i> <sup>2</sup>           | 1.032                                                                     | 1.097                                                          | 1.088                                                             |

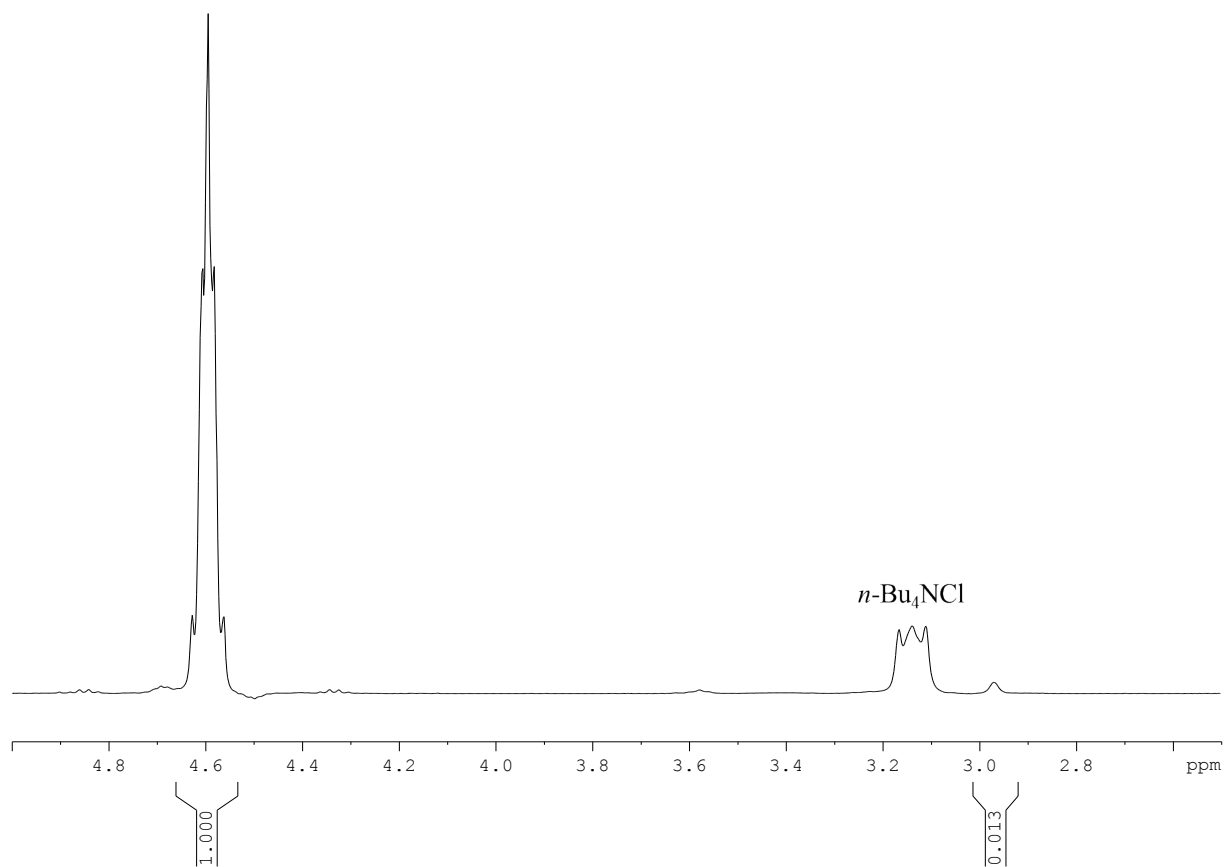

**Fig. S1** <sup>1</sup>H NMR spectrum of the methine region of crude sample produced by coupling of cyclohexene oxide and CO<sub>2</sub> using cobalt acetate complex **1** in the presence of *n*-Bu<sub>4</sub>NCl (5 mol%) at 80 °C and 300 psi CO<sub>2</sub> (400 MHz, CDCl<sub>3</sub>).

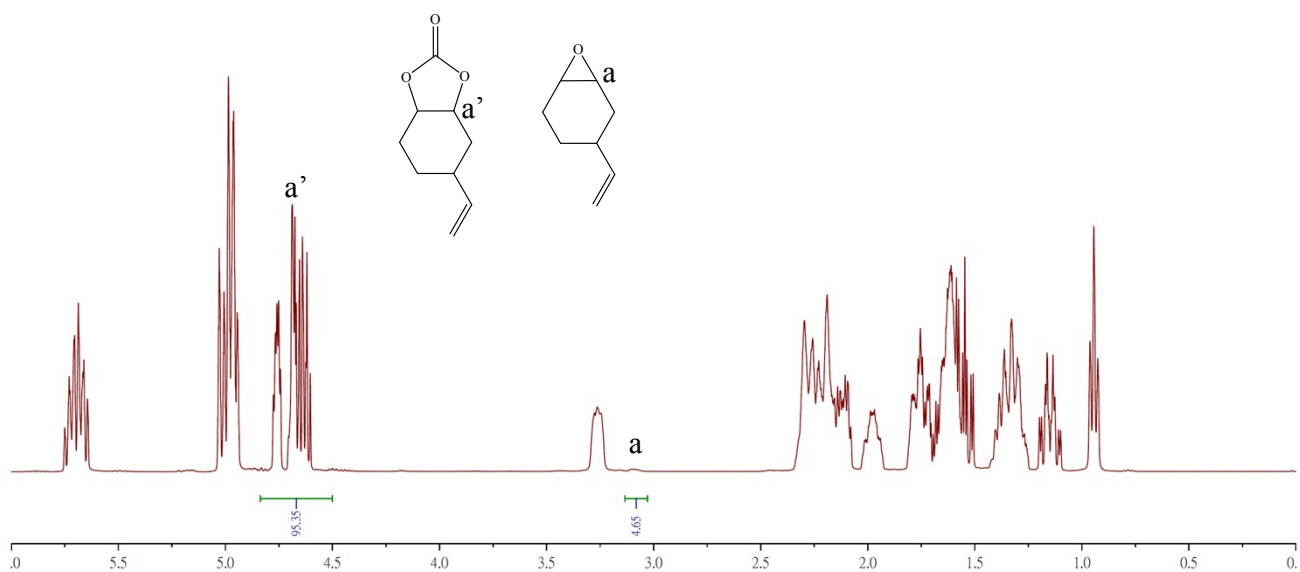

**Fig. S2** <sup>1</sup>H NMR spectrum of the crude sample from cycloaddition of **4b** and CO<sub>2</sub> using tri-cobalt acetate complex **1** in the presence of *n*-Bu<sub>4</sub>NCl.



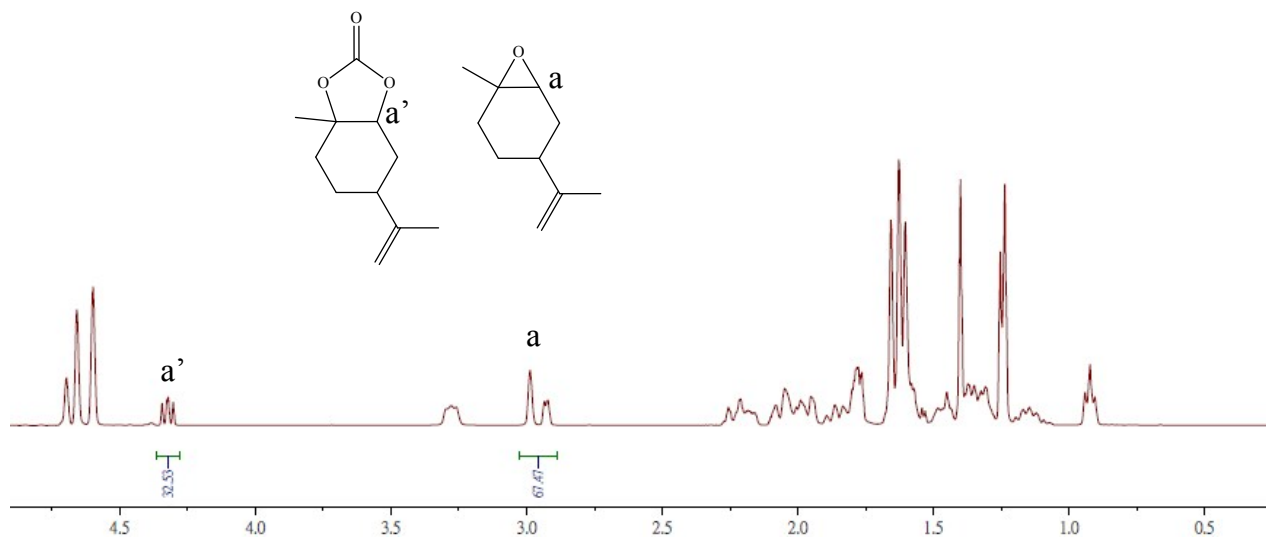

**Fig. S3**  $^1\text{H}$  NMR spectrum of the crude sample from cycloaddition of **4c** and  $\text{CO}_2$  using tri-cobalt acetate complex **1** in the presence of  $n\text{-Bu}_4\text{NCl}$ .

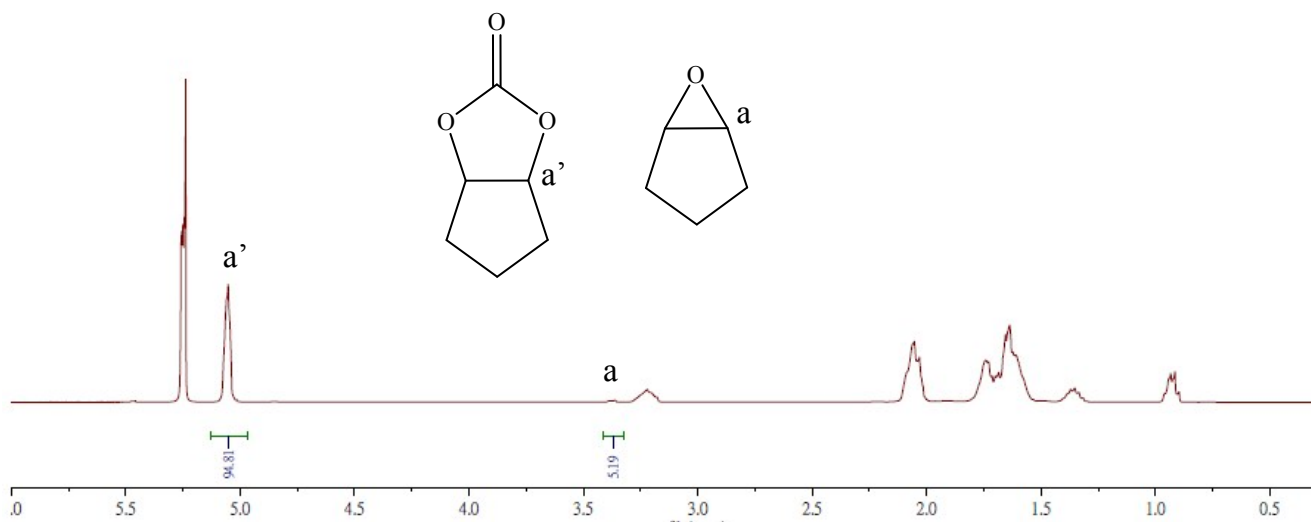

**Fig. S4**  $^1\text{H}$  NMR spectrum of the crude sample from cycloaddition of **4d** and  $\text{CO}_2$  using tri-cobalt acetate complex **1** in the presence of  $n\text{-Bu}_4\text{NCl}$ .

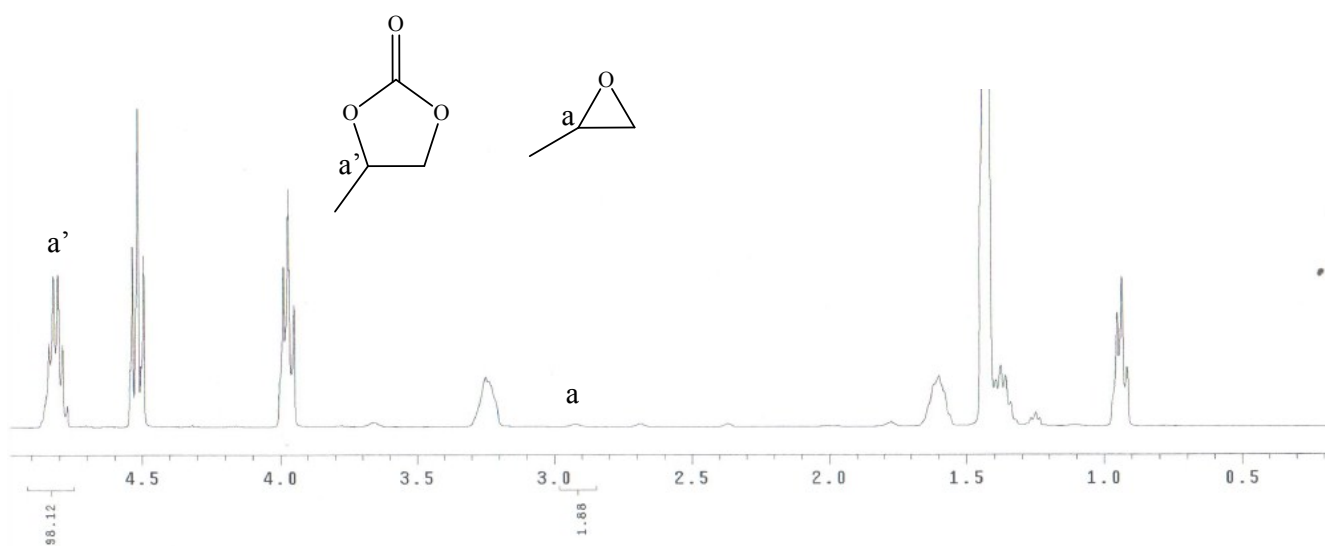

**Fig. S5** <sup>1</sup>H NMR spectrum of the crude sample from cycloaddition of **4e** and CO<sub>2</sub> using tri-cobalt acetate complex **1** in the presence of *n*-Bu<sub>4</sub>NCl.

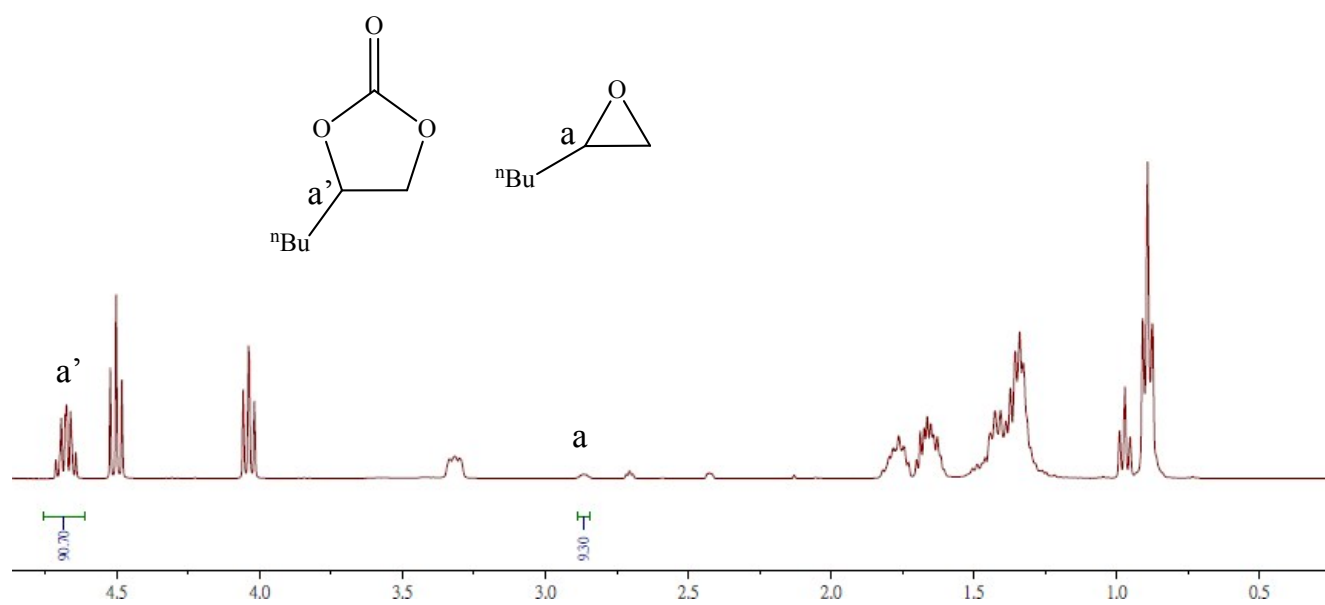

**Fig. S6**  $^1\text{H}$  NMR spectrum of the crude sample from cycloaddition of **4f** and  $\text{CO}_2$  using tri-cobalt acetate complex **1** in the presence of  $n\text{-Bu}_4\text{NCl}$ .

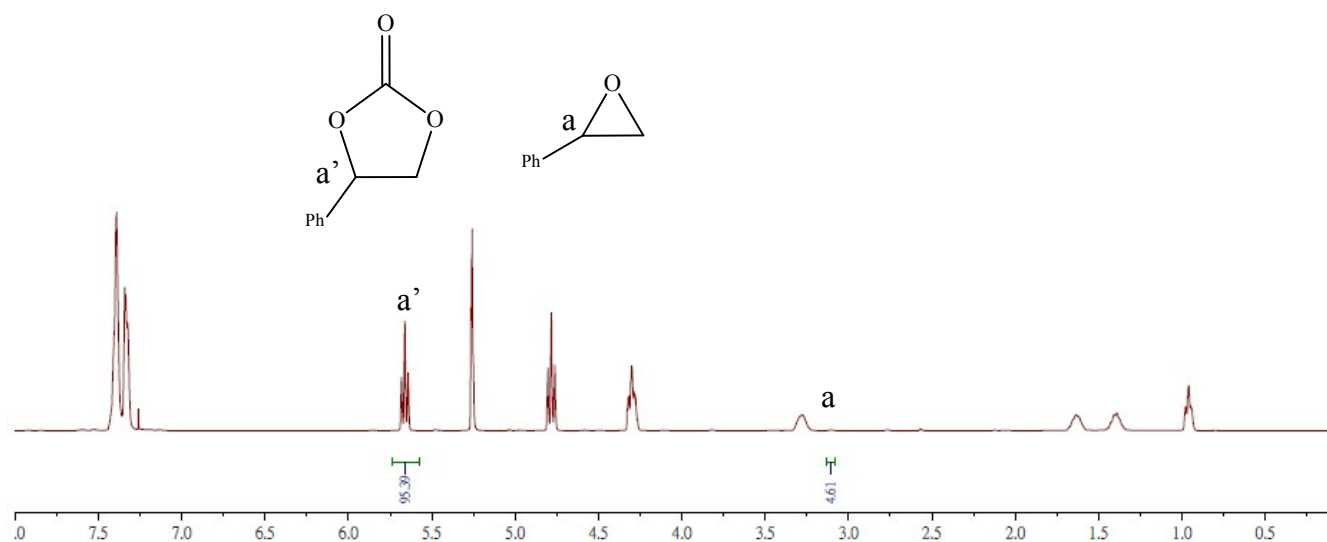

**Fig. S7** <sup>1</sup>H NMR spectrum of the crude sample from cycloaddition of **4g** and CO<sub>2</sub> using tri-cobalt acetate complex **1** in the presence of *n*-Bu<sub>4</sub>NCl.

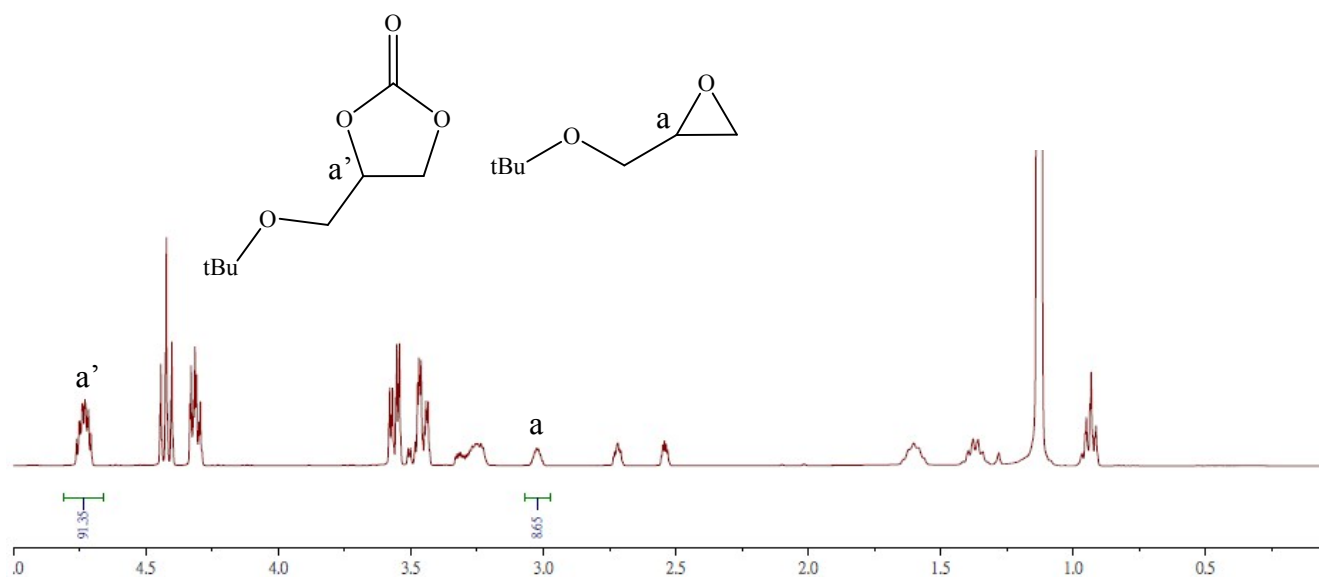

**Fig. S8** <sup>1</sup>H NMR spectrum of the crude sample from cycloaddition of **4h** and CO<sub>2</sub> using tri-cobalt acetate complex **1** in the presence of *n*-Bu<sub>4</sub>NCl.

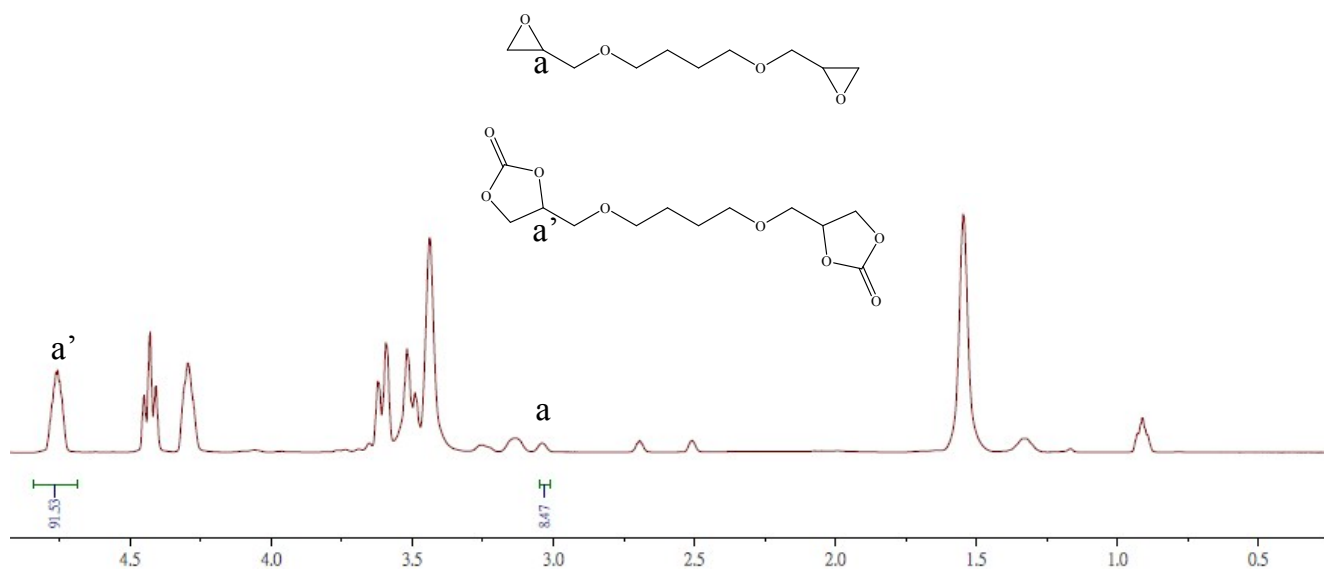

**Fig. S9** <sup>1</sup>H NMR spectrum of the crude sample from cycloaddition of **4i** and CO<sub>2</sub> using tri-cobalt acetate complex **1** in the presence of *n*-Bu<sub>4</sub>NCl.

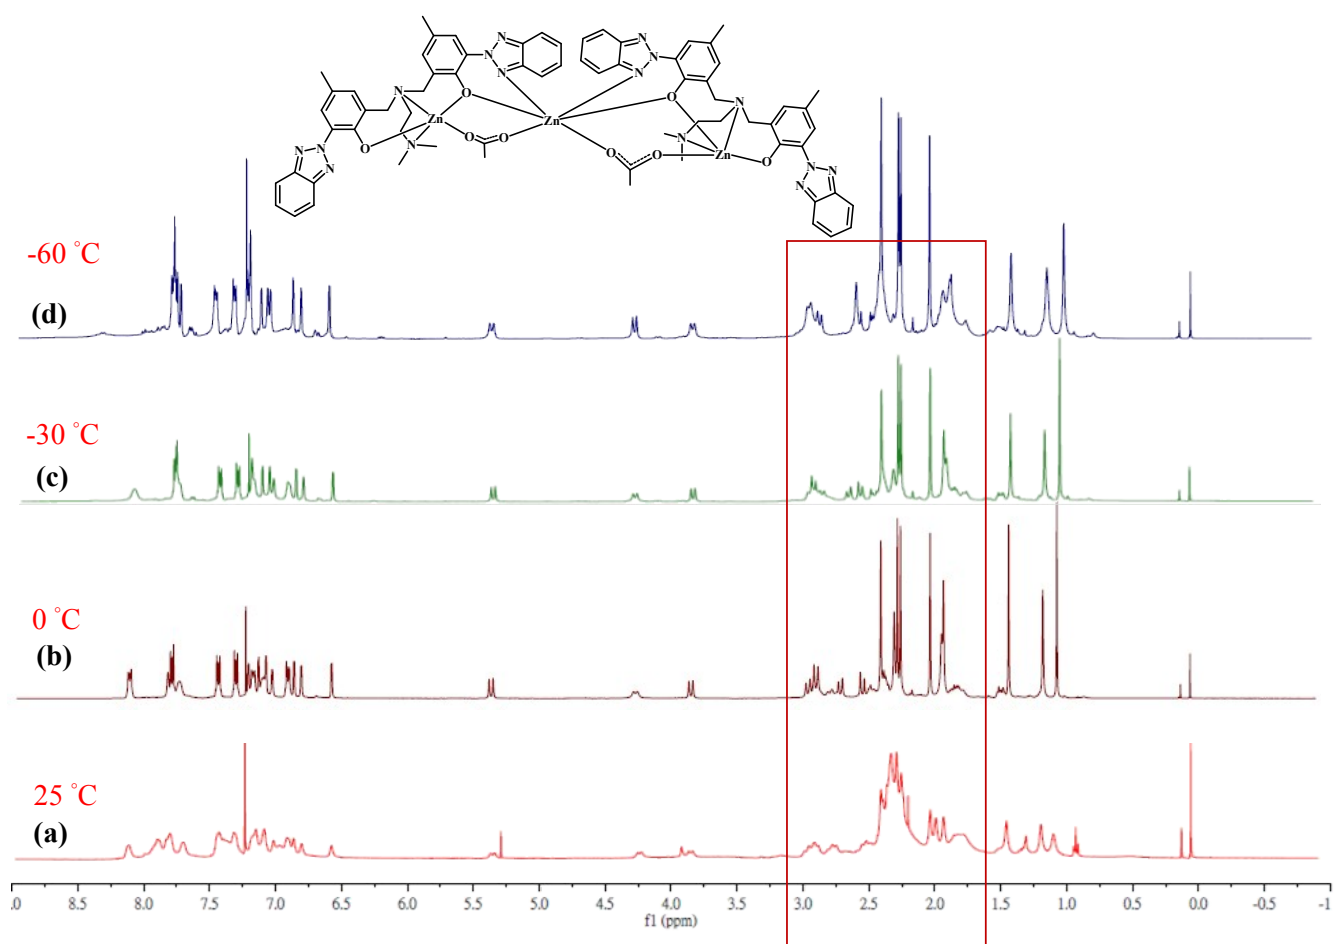

**Fig. S10** Variable-temperature <sup>1</sup>H NMR spectrum (400 MHz) of tri-Zn complex **2** in CDCl<sub>3</sub> taken at different temperatures: (a) 25 °C; (b) 0 °C; (c) -30 °C ; (d) -60 °C.



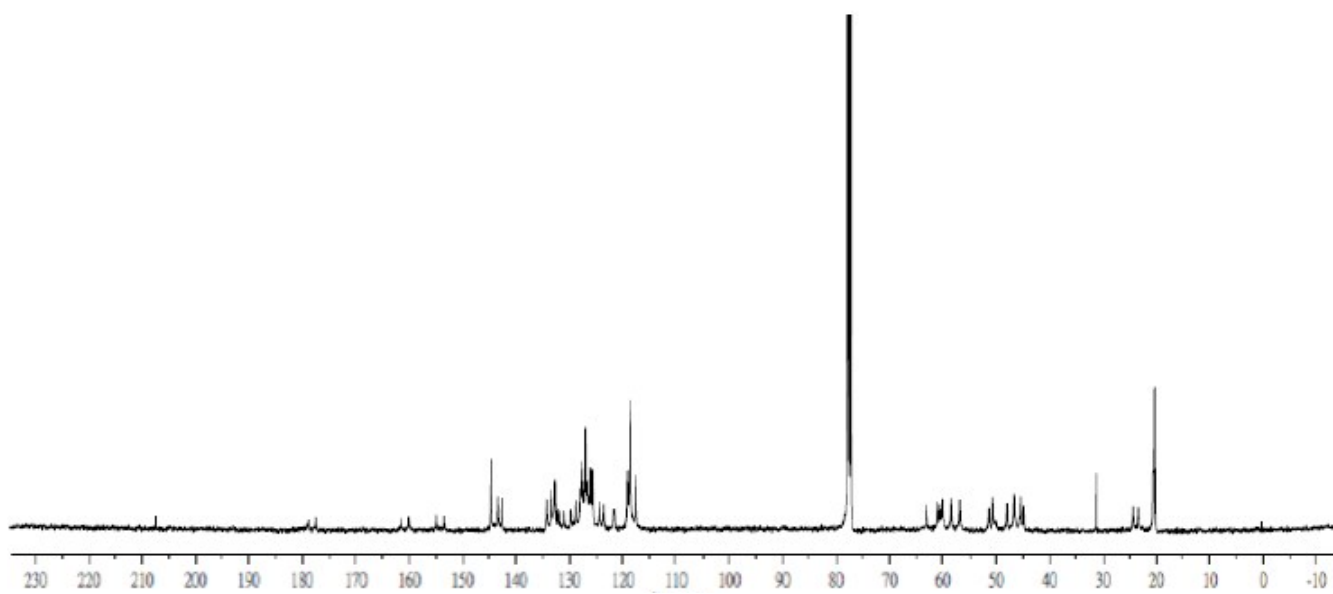

**Fig. S11**  $^{13}\text{C}$  NMR spectrum of tri-Zn complex **2** in  $\text{CDCl}_3$  (25 °C).
